# Supplementary material for: Colocalization of distant chromosomal loci in space in E. coli: a bacterial nucleolus
Source: PubMed Central journal article supplement — Genes Dev. 2016 Oct 15;30(20):2272–85. doi: 10.1101/gad.290312.116 (PMC5110994; doi:10.1101/gad.290312.116), 2016-10-15
Supplement: supp_30.20.2272_Supplemental_Information.pdf [file supp_30.20.2272_Supplemental_Information.pdf]

## **Supplemental Information**

### Supplemental Tables

Table S1. Oligonucleotide Primers Used for Strain Constructions

Table S2. Effect of ParB Binding on rRNA Promoter Activity

### Supplemental Figure Legends

### Supplemental Figures

Figure S1. Positions of all loci analyzed

Figure S2. Additional rRNA operon pairs examined

Figure S3. Movement of foci with time

Figure S4. Distances between rRNA-rRNA operon pairs are the same in cells with one focus pair or two focus pairs

Figure S5. Additional examples of loci that do not co-localize

**Table S1**

| RLG number | Sequence                                                                              | Purpose                                                   | Genom Position* |
|------------|---------------------------------------------------------------------------------------|-----------------------------------------------------------|-----------------|
| A          |                                                                                       |                                                           |                 |
| 5312       | TTCTGCCTTTGCGTCGGTTGTTGCGACATTGAA<br>TAACCTGCGATAAAAAGCCGAAGCCTTAAAC                  | Insert <i>parS</i> P1 at <i>rrnA</i><br>(used with 5313)  | 4034452         |
| 5313       | AATCAGGATCCATTTAGCCACCGGGTTCATACT<br>GGTAAAGCACAGCTTTAGAGCGTTTTGCGAT                  | Insert <i>parS</i> P1 at <i>rrnA</i><br>(used with 5312)  | 4034452         |
| 5300       | TTGGTGTCTGTCGCCGGCGATTAACCTGCTGCA<br>CGTCTGACGGCCGATAAAAAGCCGAAGCCTTA<br>AAC          | Insert <i>parS</i> P1 at <i>rrnB</i><br>(used with 5301)  | 4165804         |
| 5301       | CGAAACGCGCGATCAGCTCATGAGTATAAGAA<br>CGTTTAACTGCACAGCTTTAGAGCGTTTTGCGA<br>T            | Insert <i>parS</i> P1 at <i>rrnB</i><br>(used with 5300)  | 4165804         |
| 5925       | CACCGGGCAAATGGTGCCGGGTTTCATATTCA<br>CCTTTTAAAGATCCACAGCTTTAGAGCGTTTTGC<br>GATGAC      | Insert <i>parS</i> P1 at <i>rrnC</i><br>(used with 5926)  | 3921253         |
| 5926       | GCTGCACAGAAAACCTTTCGTATGTTCTGGCT<br>GAGAAGCTGGCGCAACGCGATAAAAAGCCGAA<br>GCCTTAAACTTTC | Insert <i>parS</i> P1 at <i>rrnC</i><br>(used with 5925)  | 3921253         |
| 5396       | TTATTGCTGAGGTAAGTATGTCTGATGTTTTAC<br>GCCCATACCGCGCGATAAAAAGCCGAAGCCTT<br>AAAC         | Insert <i>parS</i> P1 at <i>rrnD</i><br>(used with 5397)  | 3429263         |
| 5397       | TGCTATCGTCGATCATTACGCGCTGACCGATTT<br>GTGGAAAAGATCACAGCTTTAGAGCGTTTTG<br>CGAT          | Insert <i>parS</i> P1 at <i>rrnD</i><br>(used with 5396)  | 3429263         |
| 4442       | GCGAATTTTTCTCTTTCAATGGTGATCACAATTT<br>TGACTGTGGTTCACAGCTTTAGAGCGTTTTGC<br>GAT         | Insert <i>parS</i> P1 at <i>rrnE</i><br>(used with 4443)  | 4207707         |
| 4443       | AGTTATCCACAATCATCAATGTAATTTCTGTATT<br>TTGCCACGGTCGATAAAAAGCCGAAGCCTTA<br>AAC          | Insert <i>parS</i> P1 at <i>rrnE</i><br>(used with 4423)  | 4207707         |
| 5275       | TTCCGCCGCCGGAATGAATATTCACAGCATC<br>AGGGGATGCGATAAAAAGCCGAAGCCTTAAAC                   | Insert <i>parS</i> P1 at <i>rrnG</i><br>(used with 5276)  | 2724420         |
| 5276       | CCGGTGCTTGCACCGGCGACATCCCAGGCCA<br>AATCCTTCCCACAGCTTTAGAGCGTTTTGCGAT                  | Insert <i>parS</i> P1 at <i>rrnG</i><br>(used with 5275)  | 2724420         |
| 5578       | GATGTTAAGGCATCCAGACGTCTAAATCAATCA<br>GGTTTATGCGAACACAGCTTTAGAGCGTTTTGC<br>GAT         | Insert <i>parS</i> P1 at <i>rrnH</i><br>(used with 5279)  | 222765          |
| 5579       | CATGTGACGCTAGTATCGCATGTTTCGACCTG<br>CAAGAAAGTGCTCCGATAAAAAGCCGAAGCCT<br>TAAAC         | Insert <i>parS</i> P1 at <i>rrnH</i><br>(used with 5278)  | 222765          |
| 5308       | GGCGGTGAAATATCCCTGCGTAGTGACAGAAAA<br>ATAAGAAAAGGAAGCGGAATTCGGACC                      | Insert <i>parS</i> PMT at <i>rrnB</i><br>(used with 5309) | 4165804         |
| 5309       | AATCATGCGGTAGAAGAGGTCAGACTACGCAA<br>ATAATTTGCTCGAGATGCAGAAGACGCA                      | Insert <i>parS</i> PMT at <i>rrnB</i><br>(used with 5308) | 4165804         |

|      |                                                                                    |                                                           |         |
|------|------------------------------------------------------------------------------------|-----------------------------------------------------------|---------|
| 5927 | CACCGGGCAAATGGTGCCGGGTTTCATATTCA<br>CCTTTTAAGATCCGCCAAAAAACCCGCCGAA<br>GC          | Insert <i>parS</i> PMT at <i>rrnC</i><br>(used with 5928) | 3921253 |
| 5928 | GCTGCACAGAAAAACCTTTTCGTATGTTCTGGCT<br>GAGAAGCTGGCGCAACGAGGAAGCGGAATTC<br>CGGACCGG  | Insert <i>parS</i> PMT at <i>rrnC</i><br>(used with 5927) | 3921253 |
| 5398 | TTATTGCTGAGGTAAGTATGTCTGATGTTTTAC<br>GCCCATACCGCGAGGAAGCGGAATTCCGGAC<br>C          | Insert <i>parS</i> PMT at <i>rrnD</i><br>(used with 5399) | 3429263 |
| 5399 | TGCTATCGTCGATCATTACGCGCTGACCGATTT<br>GTGGAAAAAGATCTCGAGATGCAGAAGACGCA              | Insert <i>parS</i> PMT at <i>rrnD</i><br>(used with 5398) | 3429263 |
| 4444 | GCGAATTTTTCTCTTTCAATGGTGATCACAATTT<br>TGACTGTGGTTAGGAAGCGGAATTCCGGACC              | Insert <i>parS</i> PMT at <i>rrnE</i><br>(used with 4445) | 4207707 |
| 4445 | AGTTATCCACAATCATCAATGTAATTTCTGTATT<br>TTGCCACGGTCTCGAGATGCAGAAGACGCA               | Insert <i>parS</i> PMT at <i>rrnE</i><br>(used with 4444) | 4207707 |
| 5475 | TTCCGCGCCGGAAATGAATATTCACAGCATC<br>AGGGGATGAGGAAGCGGAATTCCGGACC                    | Insert <i>parS</i> PMT at <i>rrnG</i><br>(used with 5476) | 2724420 |
| 5476 | GATGTTAAGGCATCCAGACGTCTAAATCAATCA<br>GGTTTATGCGAACTCGAGATGCAGAAGACGCA              | Insert <i>parS</i> PMT at <i>rrnG</i><br>(used with 5475) | 2724420 |
| 5580 | GAGTTAACGCTCGAGGTTTTTTTTCTGTCTGTAT<br>ATCTATTATTCAGGAAGCGGAATTCCGGACC              | Insert <i>parS</i> PMT at <i>rrnH</i><br>(used with 5581) | 222765  |
| 5581 | GTTGAGGAAAAAGAGCGTAAAATGCAGAGGAT<br>TTTTGCGATTCTGCTCGAGATGCAGAAGACGC<br>A          | Insert <i>parS</i> PMT at <i>rrnH</i><br>(used with 5580) | 222765  |
| 5775 | CAAATGATCCCCTGCTGCCGGGATACTCGTT<br>TAACGCGATAAAAAGCCGAAGCCTTAAAC                   | Insert <i>parS</i> P1 at <i>araC</i><br>(used with 5776)  | 70390   |
| 5776 | ACCGTTGGCCTCAATCGGCGTTAAACCCGCCA<br>CCAGATGGGCACAGCTTTAGAGCGTTTTGCGA<br>T          | Insert <i>parS</i> P1 at <i>araC</i><br>(used with 5775)  | 71406   |
| 5406 | AAGCGGAGATCGCCTAGTGATTTTAAACTATTG<br>CTGGCAGCATTCTTGAGCGATAAAAAGCCGAA<br>GCCTTAAAC | Insert <i>parS</i> P1 at <i>latt</i><br>(used with 5407)  | 807328  |
| 5407 | CTAAAGAACAACCTGACCCAGCAAAGGTACA<br>CAATACTTTTATATTGGACACAGCTTTAGAGCG<br>TTTTGCGAT  | Insert <i>parS</i> P1 at <i>latt</i><br>(used with 5406)  | 807328  |
| 5408 | AAGCGGAGATCGCCTAGTGATTTTAAACTATTG<br>CTGGCAGCATTCTTGAGAGGAAGCGGAATTCC<br>GGACC     | Insert <i>parS</i> PMT at <i>latt</i><br>(used with 5409) | 807328  |
| 5409 | CTAAAGAACAACCTGACCCAGCAAAGGTACA<br>CAATACTTTTATATTGGACTCGAGATGCAGAAG<br>ACGCA      | Insert <i>parS</i> PMT at <i>latt</i><br>(used with 5408) | 807328  |
| 6913 | GCACTGGCGCACGTCGCCAGAAAGTATTGTTA<br>ATAAAGCGTAGTGAAACTCGATAAAAAGCCGA<br>AGCCTTAAAC | Insert <i>parS</i> P1 at <i>serT</i><br>(used with 6914)  | 1039083 |
| 6914 | TTTTTATCGCTAAAAGATAAATCCACACAGTTT<br>GTATTGTTTTGTGCAAACACAGCTTTAGAGCGT<br>TTTGCGAT | Insert <i>parS</i> P1 at <i>serT</i><br>(used with 6913)  | 1039083 |
| 6915 | GCACTGGCGCACGTCGCCAGAAAGTATTGTTA<br>ATAAAGCGTAGTGAAACTAGGAAGCGGAATTC<br>CGGACC     | Insert <i>parS</i> PMT at <i>serT</i><br>(used with 6916) | 1039083 |
| 6916 | TTTTTATCGCTAAAAGATAAATCCACACAGTTT<br>GTATTGTTTTGTGCAAACCTCGAGATGCAGAAGA<br>CGCA    | Insert <i>parS</i> PMT at <i>serT</i><br>(used with 6915) | 1039083 |

|      |                                                                                    |                                                             |         |
|------|------------------------------------------------------------------------------------|-------------------------------------------------------------|---------|
| 5268 | GCAGGGTATTGCCCAACAGAACAGCTTTAAAC<br>ATACCTGACGATAAAAAGCCGAAGCCTTAAAC               | Insert <i>parS</i> P1 at <i>ter</i><br>(used with 5269)     | 1570489 |
| 5269 | TGAGCTGCTTAGCTTTACCTGTCTGTACTGATG<br>TAGCCATCACAGCTTTAGAGCGTTTTGCGAT               | Insert <i>parS</i> P1 at <i>ter</i><br>(used with 5268)     | 1570489 |
| 5324 | TAGGCCCGATAAGCAGGCGCATCGGGCAAAT<br>GTGTTAACAGGAAGCGGAATTCCGGACC                    | Insert <i>parS</i> PMT at <i>mocA</i><br>(used with 5325)   | 3015910 |
| 5325 | TTAATCAGGTTACCGAGCATAAGATGTCTGCC<br>GAGTAAGCCTCGAGATGCAGAAGACGCA                   | Insert <i>parS</i> PMT at <i>mocA</i><br>(used with 5324)   | 3015910 |
| 5775 | CCCGACGGCATCTACGCCAGGTGGCGGTTTA<br>CTCCGACCATTTACGCCACGATAAAAAGCCGA<br>AGCCTTAAAC  | Insert <i>parS</i> P1 <i>yghJ</i><br>(used with 5776)       | 3114493 |
| 5779 | CCCGACGGCATCTACGCCAGGTGGCGGTTTA<br>CTCCGACCATTTACGCCAGTTATCGATTACGCC<br>CCGCCCTGC  | Insert <i>parS</i> PMT at <i>yghJ</i><br>(used with 5780)   | 3114493 |
| 5776 | AATGCATCCAGCTGGTCATTCTTAGCAGCACTT<br>TCCGCATCACCGAAACACACAGCTTTAGAGCG<br>TTTTGCGAT | Insert <i>parS</i> P1 <i>yghJ</i><br>(used with 5775)       | 3114548 |
| 5780 | AATGCATCCAGCTGGTCATTCTTAGCAGCACTT<br>TCCGCATCACCGAAACAAGGAAGCGGAATTCC<br>GGACCGG   | Insert <i>parS</i> PMT at <i>yghJ</i><br>(used with 5779)   | 3114548 |
| 4856 | GCAAAACGCACGCCTTTGACAAGTGCTACAGT<br>CAATACACGAAGAAAAAAGGAAGCGGAATTC<br>CGGACC      | Insert <i>parS</i> PMT at <i>ispB</i><br>(used with 4857)   | 3333580 |
| 4857 | GATTGTACTGAAAAATGGCACAGATAAACGTT<br>ACCGTACAAGTTGTGTTCTCGAGATGCAGAAG<br>ACGCA      | Insert <i>parS</i> PMT at <i>ispB</i><br>(used with 4856)   | 3333581 |
| 5451 | CAGATTTTTCGACCATTGTGGTGAGTCGATGC<br>CGGAAATGGGGAAAAAGAAGGAAGCGGAATTC<br>CGGACC     | Insert <i>parS</i> PMT at <i>rpsL</i><br>(used with 5452)   | 3377629 |
| 5452 | CCACATCGCCAATAAGGGACTAAGTCAACTATT<br>TCAGACTAAAGCGCATCCTCGAGATGCAGAAG<br>ACGCA     | Insert <i>parS</i> PMT at <i>rpsL</i><br>(used with 5451)   | 3377630 |
| 5445 | AGACGCACAGCGTCGCATCAGGCAACGGCTG<br>TCGGATGCGGCGTAAACGCAGGAAGCGGAATT<br>CCGGACC     | Insert <i>parS</i> PMT at <i>rep245</i><br>(used with 5446) | 3392187 |
| 5446 | TGTGCGTCTTATCAGGCCTACAAACGGAACAT<br>AACCGTAGGTTCGATAAGCTCGAGATGCAGAA<br>GACGCA     | Insert <i>parS</i> PMT at <i>rep245</i><br>(used with 5445) | 3392188 |
| 5437 | ATTCACTACATCAATATATATTTCAATTTACGAG<br>GTTTTAATTCTGCCTCAGGAAGCGGAATTCCG<br>GACC     | Insert <i>parS</i> PMT at <i>envR</i><br>(used with 5446)   | 3413664 |
| 5438 | ACACAAAAAAGATTAATATTCTACTGTTTTATT<br>TTGACGCGGGTTGAAACTCGAGATGCAGAAGA<br>CGCA      | Insert <i>parS</i> PMT at <i>envR</i><br>(used with 5437)   | 3413665 |
| 5349 | ATTCACTACATCAATATATATTTCAATTTACGAG<br>GTTTTAATTCTGCCTCAGGAAGCGGAATTCCG<br>GACC     | Insert <i>parS</i> PMT at <i>arcF</i><br>(used with 5350)   | 3418266 |
| 5350 | ACACAAAAAAGATTAATATTCTACTGTTTTATT<br>TTGACGCGGGTTGAAACTCGAGATGCAGAAGA<br>CGCA      | Insert <i>parS</i> PMT at <i>arcF</i><br>(used with 5349)   | 3418267 |
| 4850 | TTTCGGATGGCCTTTTCGCTTGATTTGATGTCTG<br>GCAGTTTATGGCGGGCGAGGAAGCGGAATTC<br>CGGACC    | Insert <i>parS</i> PMT at <i>yhdZ</i><br>(used with 4851)   | 3423277 |

|          |                                                                                         |                                                                             |         |
|----------|-----------------------------------------------------------------------------------------|-----------------------------------------------------------------------------|---------|
| 4851     | GTTGTTTGTCTGGTGAACACTCTCCCGAGTAGG<br>ACAAATCCGCCGGGAGCGCTCGAGATGCAGA<br>AGACGCA         | Insert <i>parS</i> PMT at <i>yhdZ</i><br>(used with 4850)                   | 3423324 |
| 5285     | CAAACTGTTCCGGGGACAGTAAGAACATTTG<br>CAGTTAACGATAAAAAGCCGAAGCCTTAAAC                      | Insert <i>parS</i> P1 at <i>arsR</i><br>(used with 5286)                    | 3648881 |
| 5286     | TAAAACACATCTGAAAATTCATATGTGTTTAGCT<br>AAATTTACAGCTTTAGAGCGTTTTGCGAT                     | Insert <i>parS</i> P1 at <i>arsR</i><br>(used with 5285)                    | 3648881 |
| 5272     | GCAGGATGTTTGATTA AAAACATAACAGGAAGA<br>AAAATGCAGGAAGCGGAATTCCGGACC                       | Insert <i>parS</i> PMT at <i>oriC</i><br>(used with 5272)                   | 3911813 |
| 5271     | AATCGGTTACGGTTGAGTAATAAATGGATGCC<br>CTGCGTAACTCGAGATGCAGAAGACGCA                        | Insert <i>parS</i> PMT at <i>oriC</i><br>(used with 5271)                   | 3911819 |
| 5402     | CTCATTAAACGTTGGTTGTCAGTTCCGGTGCCAT<br>CGAGAGCGCATGCTCCACCAAGGAAGCGGAA<br>TTCCGGACC      | Insert <i>parS</i> PMT <i>yjaA</i><br>(used with 5343)                      | 4214112 |
| 5343     | AGCCGGTTGGATTTATGTTGCTAAGTGGGCAG<br>CATATGGATGCTCGAGATGCAGAAGACGCA                      | Insert <i>parS</i> PMT <i>yjaA</i><br>(used with 5402)                      | 4214112 |
| 6095     | AACGCAAACCAGAGCTGTACAGGCTTGGGCGC<br>GGCTTTCAAACCAGTCGTCTCGAGATGCAGAA<br>GACGCATCTG      | Insert <i>parS</i> PMT at <i>yjhE</i><br>(used with 6096)                   | 4506513 |
| 6096     | GTTATACAGAAATGTCCGTTAAGCAGAGTTCAA<br>AATTGATTGCCGTGATCAGGAAGCGGAATTCC<br>GGACCGGC       | Insert <i>parS</i> PMT at <i>yjhE</i><br>(used with 6095)                   | 4506513 |
| <b>B</b> |                                                                                         |                                                                             |         |
| 7052     | GTACGAGGGCATT TTTATCGCAGGTAATCCATT<br>AATTGAATGTTAGTTCGCGATAAAAAGCCGAAG<br>CCTTAAACTTTC | Delete <i>rrnD</i> operon<br>(RLG13970) (used with<br>7105)                 | 3430018 |
| 7105     | GACAAACAACAGATAAAAACAAAAGGCCAGTC<br>TTCCGACTGAGCCTTTTGTACAGCTTTAGAGC<br>GTTTTGCGATGAC   | Delete <i>rrnD</i> operon<br>(RLG13970) (used with<br>7052)                 | 3423897 |
| 7106     | CGCGACAGTGAGCTGAAAGCCGCGTCGCAAC<br>TGCTCTTTAAACAATTTATCCGATAAAAAGCCGA<br>AGCCTTAAACTTTC | Delete <i>rrnD</i> structural Gene<br>(RLG14083) (used with<br>7105)        | 3429362 |
| 7055     | GATAAATTGTTAAAGAGCAGTTGCGACGCGGC<br>TTTCAGCTCACTGTCGCGGATAAAAAGCCGA<br>AGCCTTAAACTTTC   | Delete <i>rrnD</i> Fis sites, P1P2<br>(RLG13995) (used with<br>7052)        | 3429541 |
| 7326     | AAGCACCGTTTTGTGTGCGATTGCAGCAAAA<br>GGGTGAAAAACAACCGATAAAAAGCCGAAGC<br>CTTAAAC           | Delete <i>rrnD</i> Fis sites, P1<br>promoter (RLG14187)<br>(used with 7327) | 3429707 |
| 7327     | ATTGTTAAAGAGCAGTTGCGACGCGGCTTTCA<br>GCTCACTGTCGCGAGGTGCACAGCTTTAGAGC<br>GTTTTGCGAT      | Delete <i>rrnD</i> Fis sites, P1<br>promoter (RLG14187)<br>(used with 7326) | 3429647 |
| 7328     | TTCGTTGTTCCGACCATCCTGTGAAGTGTTC<br>CGTTGTCGTCTCAACGGAGCACAGCTTTAGAG<br>CGTTTTGCGAT      | Delete <i>rrnD</i> P2 promoter<br>(used with 7055)<br>(RLG14524)            | 3429648 |
| 7282     | GTTCCGACCATCCTGTGAAGTGTTCACGTTGT<br>CGTCTCAAAAATGAGACGTTGATCGGCACG                      | Insert <i>cat-sacB</i> to <i>rrnD</i> P1<br>(used with 7283)                | 3429647 |
| 7283     | GAAAAAAGATCAAAAAATACTTGTGCAAAAA<br>ATTGGGATCATCAAAGGGAAAACCTGTCCA                       | Insert <i>cat-sacB</i> to <i>rrnD</i> P1<br>(used with 7282)                | 3429687 |
| 7330     | AAGGGTGAAAAACAACAACAGAAAAAAGAT<br>CAAAAAATACTTGTGCAAAAAATTGGGATCCC<br>TCTAACGCGCCTCCG   | Create tCtaC mutation in<br><i>rrnD</i> P1 (used with 7331)                 | 3429668 |

|          |                                                                                           |                                                                 |         |
|----------|-------------------------------------------------------------------------------------------|-----------------------------------------------------------------|---------|
| 7331     | GTTCCGACCATCCTGTGAAGTGTTTCACGTTGT<br>CGTCTCAACGGAGGCGCGTTAGAGGGATCCC<br>AATTTTTTGCACAAGTA | Create tCtaaC mutation in<br><i>rrnD</i> P1<br>(used with 7330) | 3429586 |
| <b>C</b> |                                                                                           |                                                                 |         |
| 4679     | GGCATACTTCGAAAATTTTTCGTA AACAGAAAT<br>AAAGAGCTGACAGA ACTTGCCCTCTTGGGTTA<br>TCAAG          | Delete <i>fis</i><br>(used with 4680)                           | 3411271 |
| 4680     | TCCCCATGCCGAGTAGCGCCTTTTTAATCAAG<br>CATTTAGCTAACCTGAATGTACGTTGGAGCCG<br>CATTAT            | Delete <i>fis</i><br>(used with 4679)                           | 3411567 |
| 6080     | TCTATTATTACCTCAACAAACCACCCCAATATA<br>AGTTTGAGATTACTACATGCCCTCTTGGGTAT<br>CAAG             | Delete <i>hns</i><br>(used with 6081)                           | 1292922 |
| 6081     | CAATAAAAAATCCCGCCGCTGGCGGGATTTTA<br>AGCAAGTGCAATCTACAAAAGAGTACGTTGGA<br>GCCGCATTAT        | Delete <i>hns</i><br>(used with 6080)                           | 1292509 |
| 6211     | CAACAGAACATATTGACTATCCGGTATTACCCG<br>GCATGACAGGAGTAAAATGCCCTCTTGGGTTA<br>TCAAG            | Delete <i>recA</i><br>(used with 6212)                          | 2823769 |
| 6212     | TAAAAAAGCAAAGGGCCGCAGATGCGACCCT<br>TGTGTATCAAACAAGACGAGTACGTTGGAGCC<br>GCATTAT            | Delete <i>recA</i><br>(used with 6211)                          | 2822708 |
| 7192     | AAATGATGAATAAACGCCCTGTTAATGAATAT<br>CTGGCATGTTGTACTAATGCCCTCTTGGGTAT<br>CAAG              | Delete <i>lrp</i><br>(used with 7195)                           | 932595  |
| 7195     | TAAGCAGCGCCGTATAGCCCTGAATAAACCCCT<br>TGTCTTTCCAGCCGACGCACGTACGTTGGAGC<br>CGCATTAT         | Delete <i>lrp</i><br>(used with 7192)                           | 933089  |
| <b>D</b> |                                                                                           |                                                                 |         |
| 4442     | CGATAAAAAGCCGAAGCCTTAAAC                                                                  | Amplify <i>parS</i> P1 kan<br>(used with 4443)                  | n/a     |
| 4443     | CACAGCTTTAGAGCGTTTTGCGAT                                                                  | Amplify <i>parS</i> P1 kan<br>(used with 4442)                  | n/a     |
| 4444     | AGGAAGCGGAATTCCGGACC                                                                      | Amplify <i>parS</i> PMT Cm<br>(used with 4445)                  | n/a     |
| 4445     | CTCGAGATGCAGAAGACGCA                                                                      | Amplify <i>parS</i> PMT Cm<br>(used with 4444)                  | n/a     |

**Table S1.** Oligonucleotide Primers Used for Strain Constructions

Sequences are always written 5' to 3'. The primers used together are indicated in the "Purpose" column. The numerical designation of Genome Position is from EcoCyc.

(A) Primers used for creation of *parS* sites at different positions in the *E. coli* chromosome. *parS* sites from phage P1 or plasmid PMT, as indicated, bind the ParB-CFP or ParB-YFP fusions, respectively.

(B) Primers used for deletions or mutations in *rrnD*. Mutation endpoints/positions are described in the legend of Figure 3.

(C) Gene deletions. In each case, the deletion starts precisely at the translation initiation codon and ends with the stop codon (see Supplemental Materials and Methods).

(D) Primers for amplifying *parS* sites.

**Table S2.**

| <u>Medium</u>      | ParB-YFP                                      |      |                | ParB-CFP                                      |      |                |
|--------------------|-----------------------------------------------|------|----------------|-----------------------------------------------|------|----------------|
|                    | <u><math>\beta</math>-gal activity (M.U.)</u> |      | <u>percent</u> | <u><math>\beta</math>-gal activity (M.U.)</u> |      | <u>percent</u> |
| LB                 | 10700                                         | 9300 | 87%            | 9900                                          | 7600 | 76%            |
| MOPS glu, aa, nucl | 10000                                         | 9300 | 94%            | 8800                                          | 6800 | 76%            |
| MOPS gly, aa, nucl | 6600                                          | 6300 | 95%            | 7200                                          | 4300 | 61%            |
| MOPS glu           | 3900                                          | 3600 | 92%            | 4100                                          | 2900 | 73%            |
| MOPS gly           | 3400                                          | 2400 | 70%            | 3000                                          | 2300 | 79%            |

**Table S2.** Effect of ParB Binding on rRNA Promoter Activity

ParB has been reported to oligomerize and spread from its site of initial binding (Nielson et al. 2006). The effect of a *parS* site on the bacterial chromosome relatively close to the rRNA promoter region was tested for interference with expression of an adjacent *rrnB* P1-*lacZ* fusion in media resulting in a range of growth rates during log phase. The *parS* site was 80 bp upstream of the transcription start site. Activities are in Miller Units (M.U.). Effects of two different ParB fusion proteins were analyzed, ParB-YFP (RLG7730) and ParB-CFP (RLG7728) bound to their cognate *parS* sites. The *parS* sites inserted just upstream of an rRNA operon affected promoter activity only very slightly.



## Supplemental Figure Legends

### Figure S1. Positions of all loci analyzed

The *parS* insertions are named by the nearest gene (see also Table 1). The sequence coordinate (in parenthesis) refers to the position of the beginning of the coding region of that gene. The colored regions indicate the limits of proposed macrodomains on the *E. coli* chromosome (Espeli and Boccard 2006). Names of macrodomains are in upper case inside the circle. All loci examined and their genome coordinates are indicated on the outside of the circle. The sequence coordinates (and the sequences) of the primers used to create the *parS* site insertions are in Table S1.

### Figure S2. Additional rRNA operon pairs examined

Cells were examined in EZ-rich glucose defined medium. Genetic distance (kb) and physical distance (nm) separating pairs are shown along with number of cells examined (n). The first member of the pair has the *parS* site with the bound ParB-CFP, and the second member of the pair has the *parS* site with the bound ParB-YFP. Strain names are in parentheses.

- (A) *rrnA*, *rrnB* (RLG11531)
- (B) *rrnA*, *rrnD* (RLG10665)
- (C) *rrnE*, *rrnH* (RLG10669)
- (D) *rrnD*, *rrnE* (RLG10673)
- (E) *rrnA*, *rrnH* (RLG10654)
- (F) *rrnB*, *rrnG* (RLG10974)
- (G) *rrnD*, *rrnB* (RLG11507)
- (H) *rrnG*, *rrnD* (RLG11980)

**Figure S3.** Movement of foci with time

(A) A representative cell containing *rrnD*-CFP viewed at one sec intervals. Sequential displacement of the CFP focus is represented by lines illustrating movement at 1 sec intervals.

(B) Close-up of the ParB-CFP focus at *rrnD* shown in (A).

(C) Distribution of distances traveled by the *rrnD*-CFP focus in 1 sec ( $69 \text{ nm} \pm 14 \text{ nm}$ ;  $n=1000$ ). Measurements were collected from foci in multiple cells.

(D) Close-up of a representative ParB-YFP focus at *rrnE*. Sequential displacement of the YFP focus is represented by lines illustrating movement at 1 sec intervals.

(E) Distribution of distances traveled by the *rrnE*-YFP focus in 1 sec ( $84 \text{ nm} \pm 24 \text{ nm}$ ;  $n=2000$ ). Measurements were collected from foci in multiple cells.

**Figure S4.** Distances between rRNA-rRNA operon pairs are the same in cells with one focus pair or two focus pairs

Cells shown in (A) and (B) were from the same culture containing *rrnD*-CFP and *rrnE*-YFP (RLG10673) grown in EZ-rich glucose medium at 30°C. Medians and distributions are shown next to images.

(A) Cells with 1 focus pair.

(B) Cells with 2 focus pairs.

(C) A cell containing *rrnD*-CFP and *rrnA*-YFP (RLG10672) with an uneven number of foci (indicated by red arrows). The extra focus is from the *parS* site adjacent to *rrnA*, which is closer to the origin of replication than *rrnD* and thus replicated first.

**Figure S5.** Additional examples of loci that do not co-localize

(A) *rrnC*, *rrnB* (RLG12002)

- (B) *rrnC*, *rrnG* (RLG12005)
- (C) *rrnD*, *yhdZ* (RLG10922)
- (D) *rpsL*, *rrnD* (RLG11990)
- (E) *rrnD*, *ispB* (RLG10928)
- (F) *rrnD*, *yghJ* (RLG10996)
- (G) *rrnD*, *mocA* (RLG11511)
- (H) *rrnD*, *yjhE* (RLG11519)
