# Supplementary figures and images for: Colocalization of distant chromosomal loci in space in E. coli: a bacterial nucleolus
Source: PubMed Central journal article supplement — Genes Dev. 2016 Oct 15;30(20):2272–85. doi: 10.1101/gad.290312.116 (PMC5110994; doi:10.1101/gad.290312.116), 2016-10-15

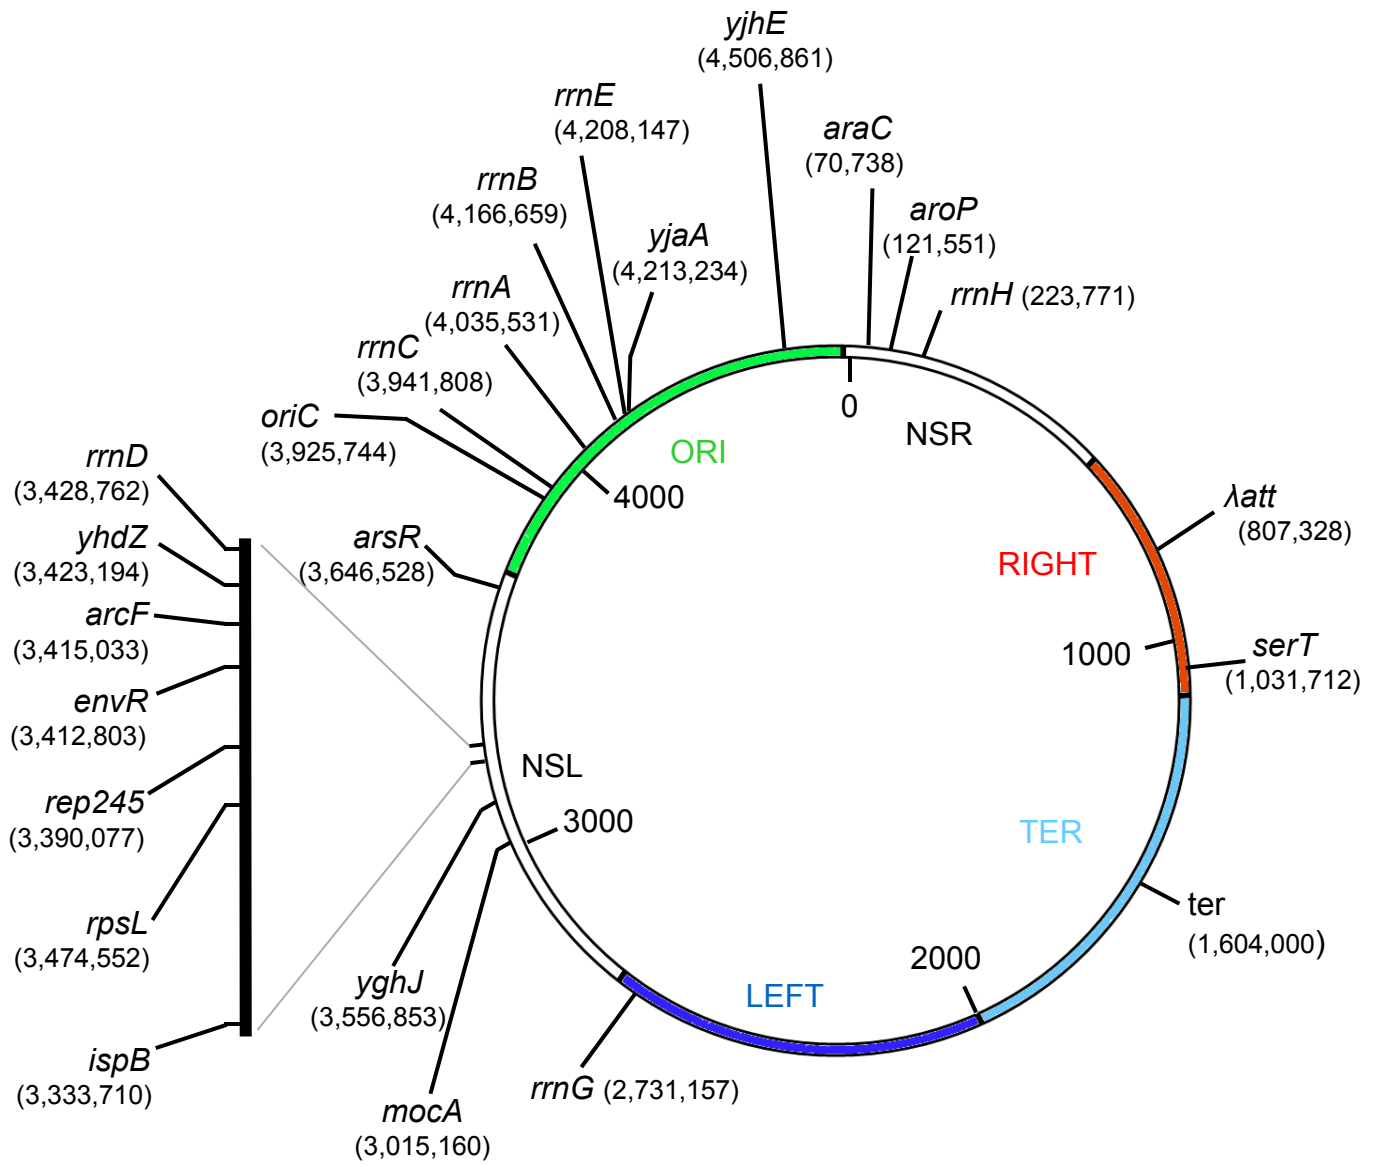

Supplemental\_Fig\_S1

Supplement: supp_30.20.2272_Supplemental_Fig_S1.pdf [file supp_30.20.2272_Supplemental_Fig_S1.pdf]

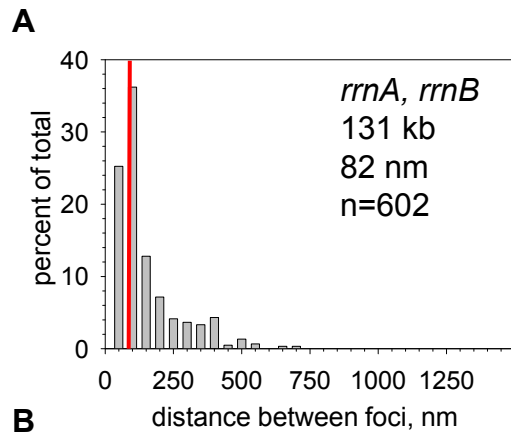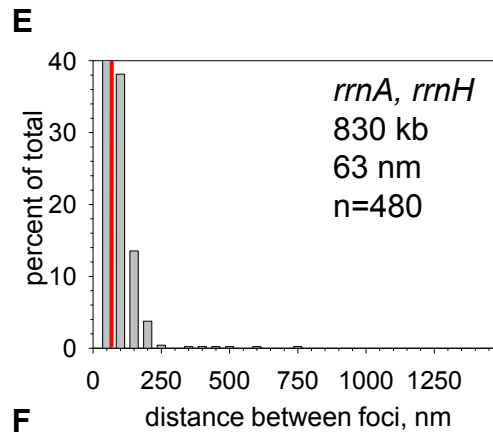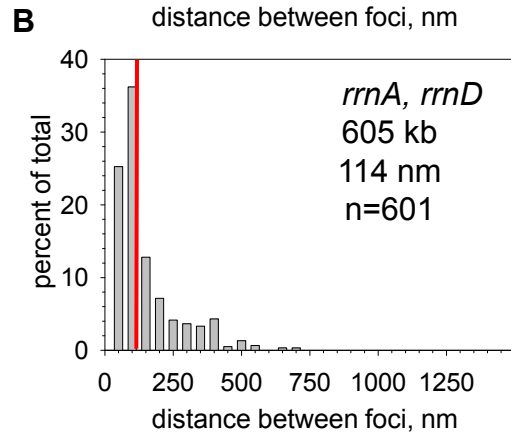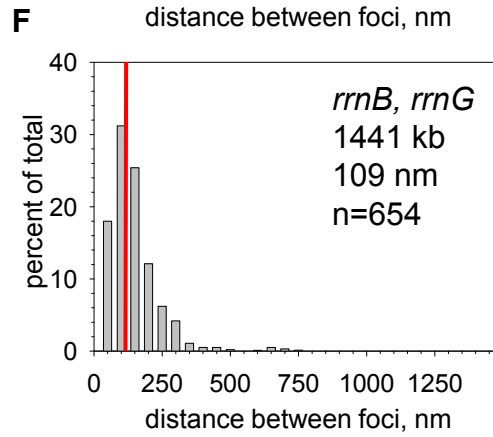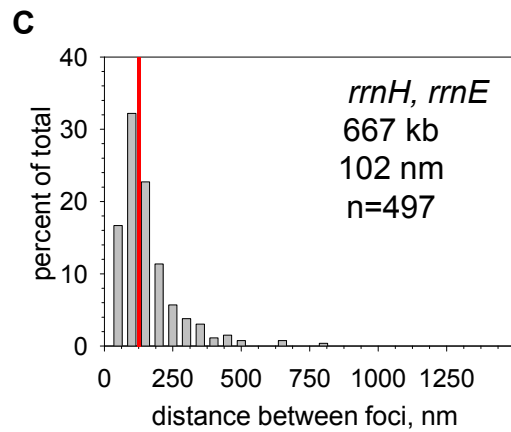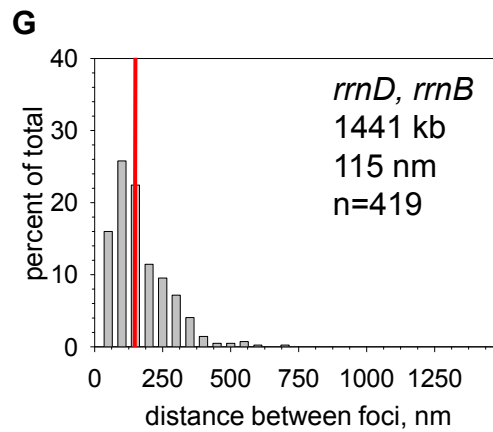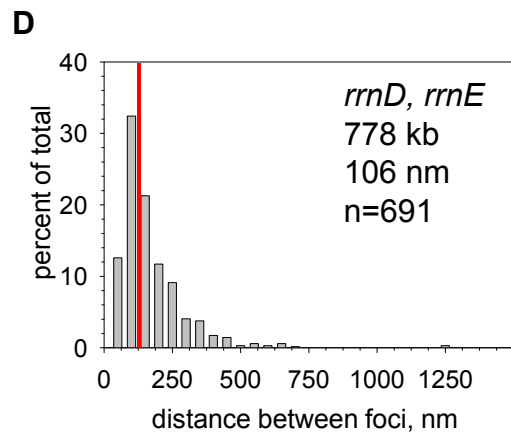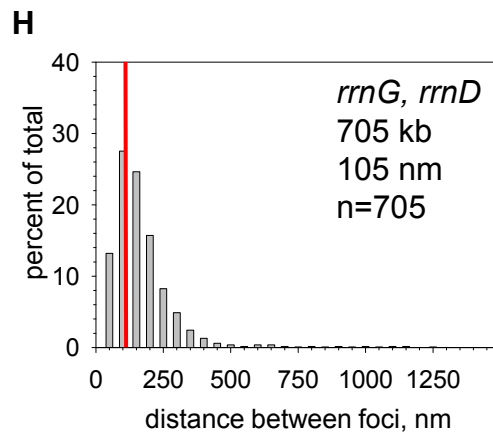

Supplement: supp_30.20.2272_Supplemental_Fig_S2.pdf [file supp_30.20.2272_Supplemental_Fig_S2.pdf]

**A**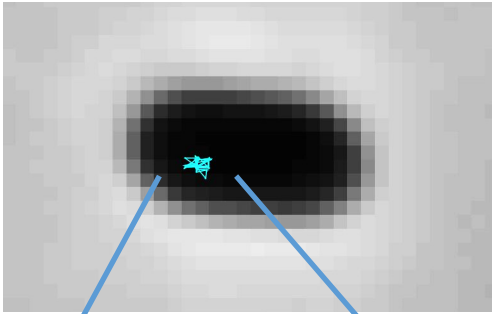**B**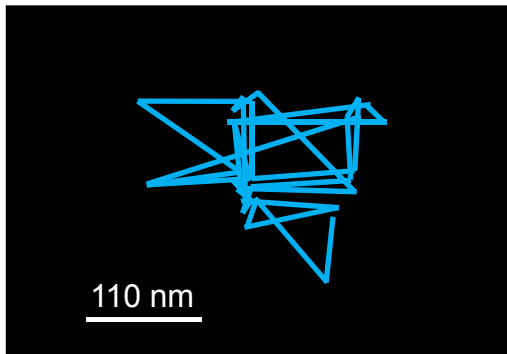**D**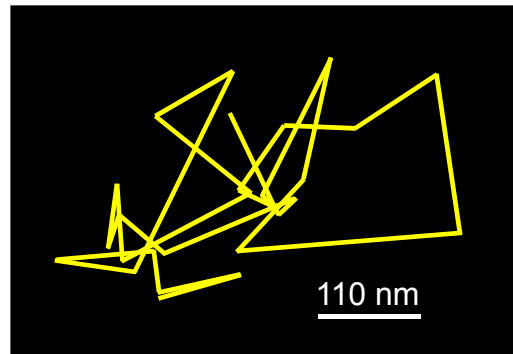**C**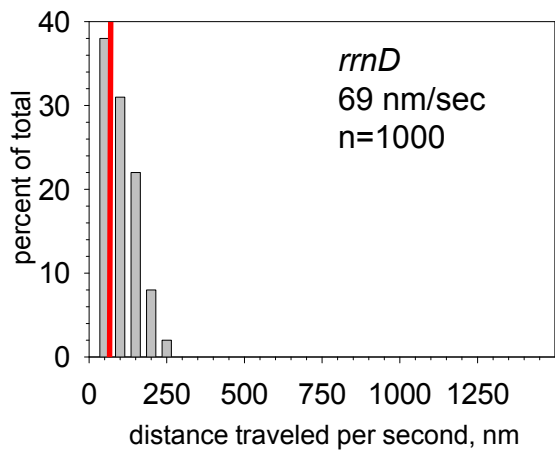**E**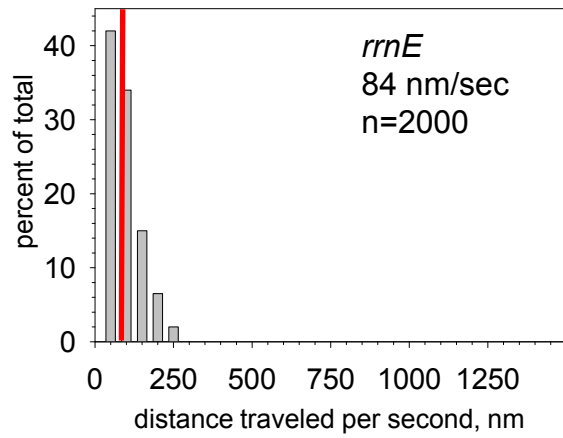

Supplement: supp_30.20.2272_Supplemental_Fig_S3.pdf [file supp_30.20.2272_Supplemental_Fig_S3.pdf]

**A** one focus pair

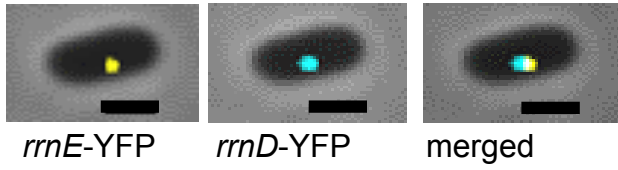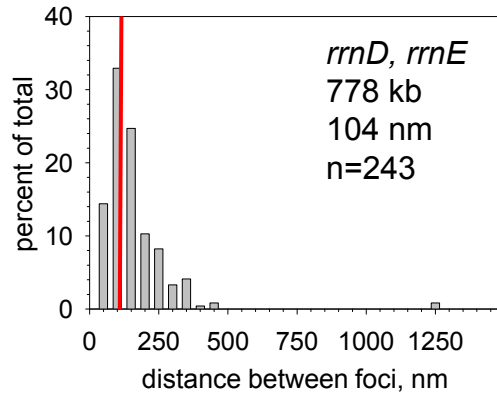

**B** two focus pairs

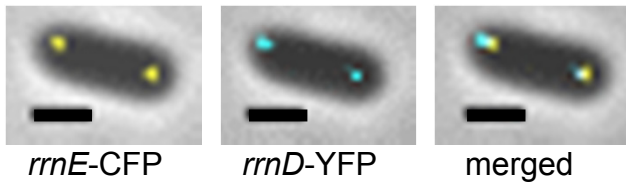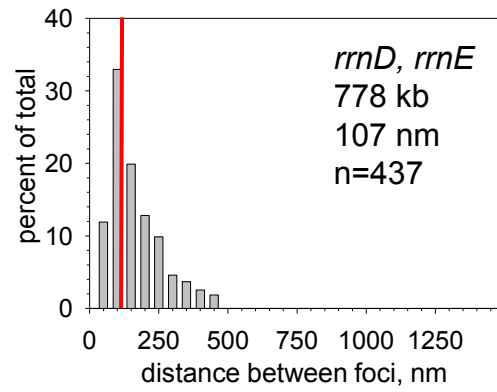

**C**

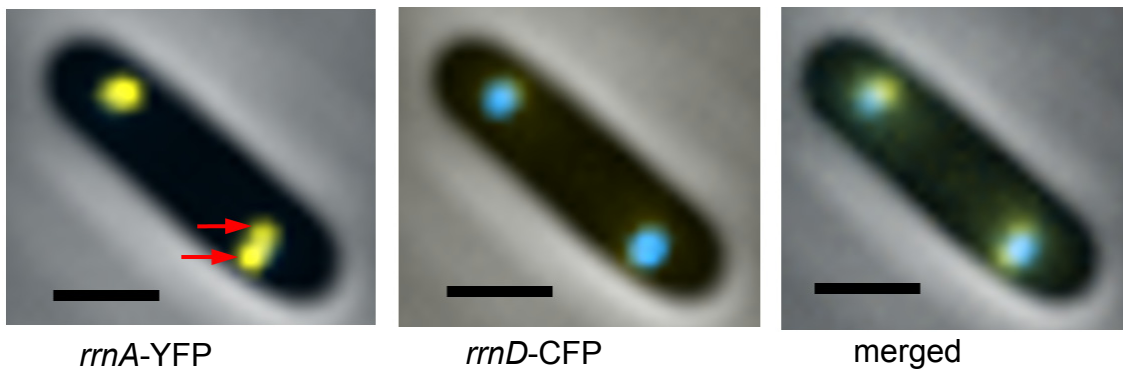

Supplement: supp_30.20.2272_Supplemental_Fig_S4.pdf [file supp_30.20.2272_Supplemental_Fig_S4.pdf]

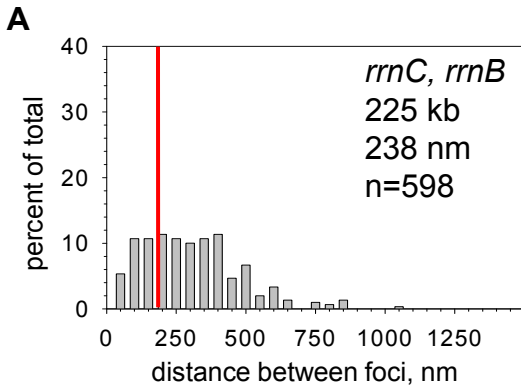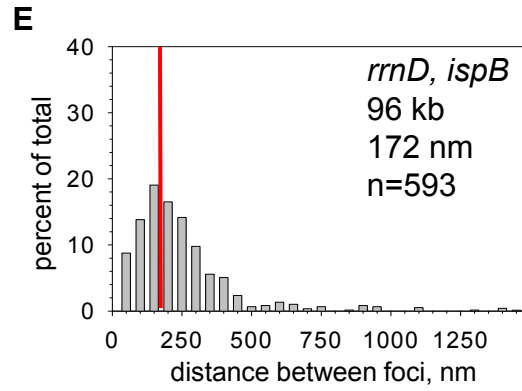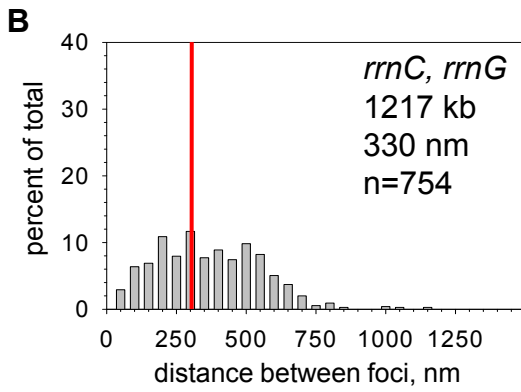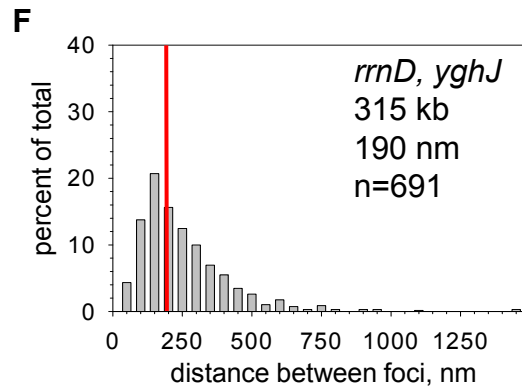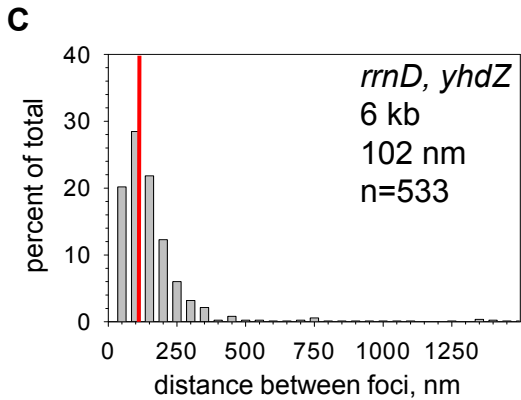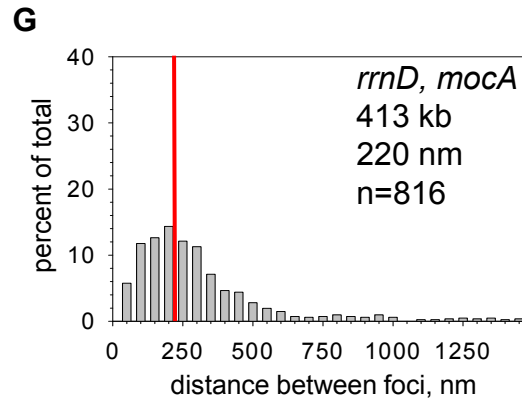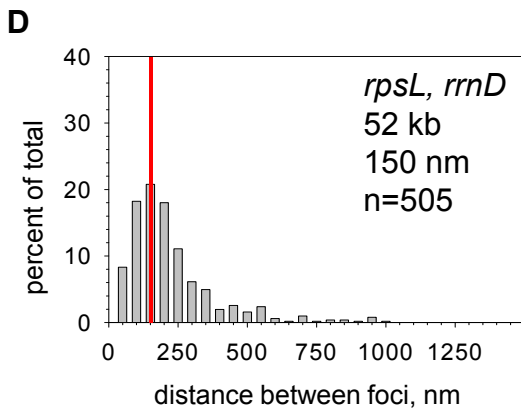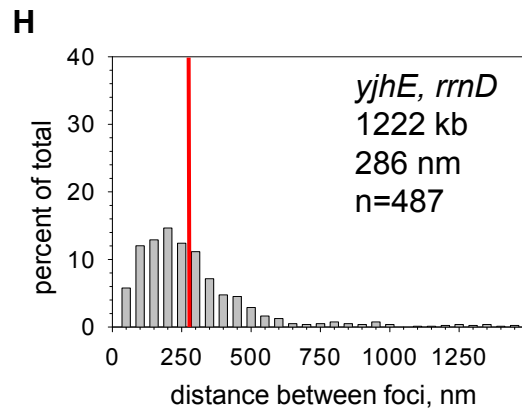

Supplement: supp_30.20.2272_Supplemental_Fig_S5.pdf [file supp_30.20.2272_Supplemental_Fig_S5.pdf]
